# Supplementary material for: Synthesis and characterization of poly(ethylene terephthalate-co-1,4-cyclohexanedimethylene terephtlatate)-block-poly(tetramethylene oxide) copolymers
Source: Royal Society of Chemistry journal article supplement (doi:10.1039/c7ra07172h), 2017-01-01
Supplement: c7ra07172h1.pdf [file c7ra07172h1.pdf]

Supporting Information for

**Synthesis and characterization of poly(ethylene terephthalate-  
co-1,4-cyclohexanedimethylene terephthalate)- *block*-  
poly(tetramethylene oxide) copolymers**

S. Paszkiewicz, A. Szymczyk, D. Pawlikowska, I. Irska, I. Taraghi, R. Pilawka, J. Gu, X.

Li, Y. Tu and E. Piesowicz

## **Characterization method.**

The  $^1\text{H}$ - $^{13}\text{C}$  gHSQC (gradient enhanced heteronuclear single quantum coherence) 2D-NMR experiment was performed with a standard Varian pulse sequence with  $90^\circ$  pulse widths of 9.1 and 8.6  $\mu\text{s}$  for  $^1\text{H}$  and  $^{13}\text{C}$ , respectively. The  $^1\text{H}$  dimension had a spectral width of 9.6 kHz, and the  $^{13}\text{C}$  dimension had a spectral width of 25.6 kHz, acquisition time of 0.15 s, 1.0 s relaxation delay; 16 transients were averaged for each of 256 increments using the States method of phase sensitive detection in  $f_1$ . Delays were optimized depending on the coupling interests. The data were zero-filled to  $4096 \times 4096$  and weighted with sine bell and shifted sine bell functions prior to Fourier transformation.

The  $^1\text{H}$ - $^1\text{H}$  gCOSY (gradient correlation spectroscopy) 2D NMR experiments were performed with the standard Agilent sequence. This was done with a 9.6 kHz spectral width, 0.15 s acquisition time, 1 s relaxation delay, and 9.1  $\mu\text{s}$   $90^\circ$  pulse width; a total of 8 transients were averaged for each 256 increments using the States method of phase sensitive detection in  $f_1$ . Processing was done with shifted sine bell weighting functions in both dimensions and zero-filling to a  $1024 \times 1024$  data matrix prior to Fourier transformation.

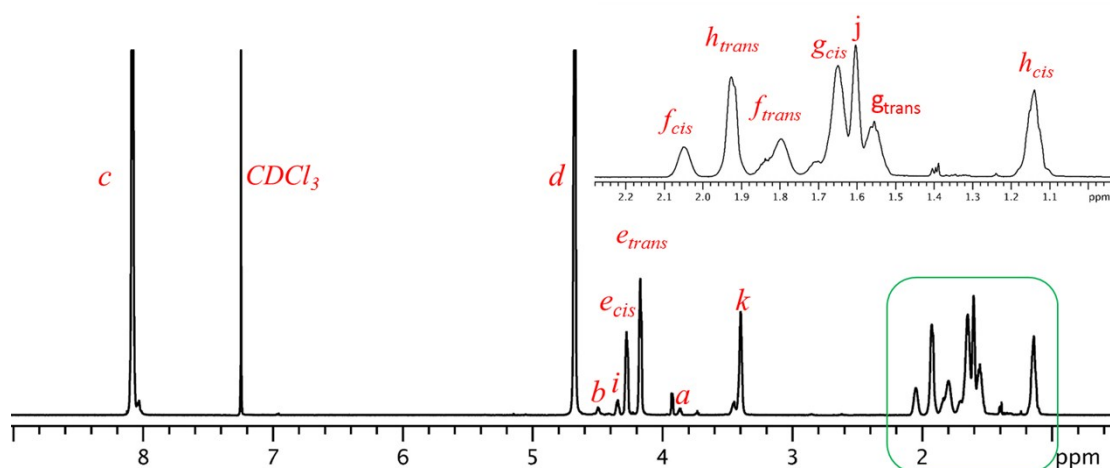

Figure S1.  $^1\text{H}$  quantitative NMR spectra of PEE 90/10 sample. Solvent:  $\text{CDCl}_3$ .

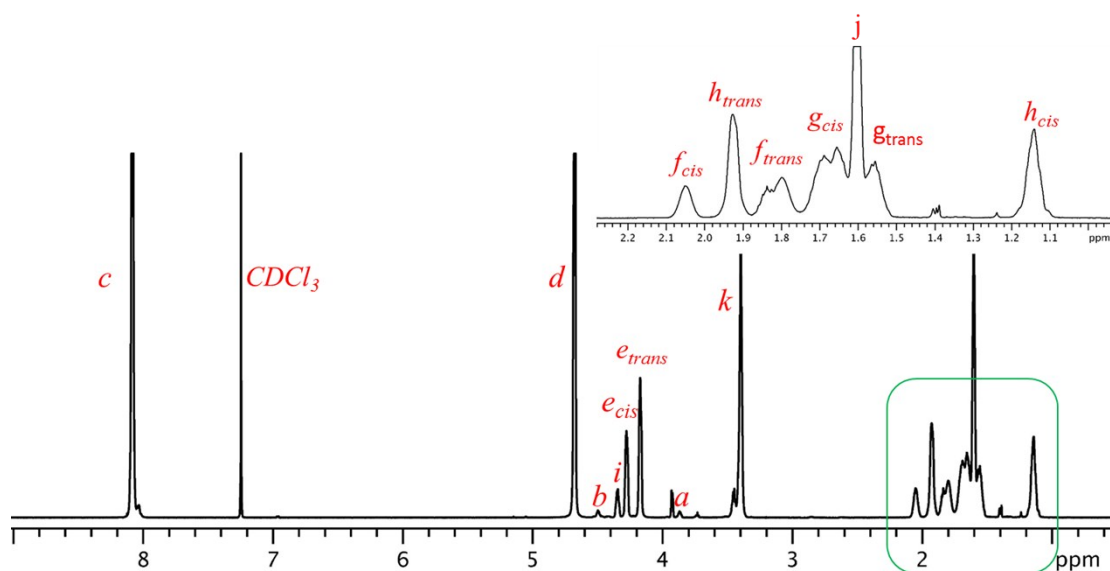

Figure S2.  $^1\text{H}$  quantitative NMR spectra of PEE 80/20 sample. Solvent:  $\text{CDCl}_3$ .

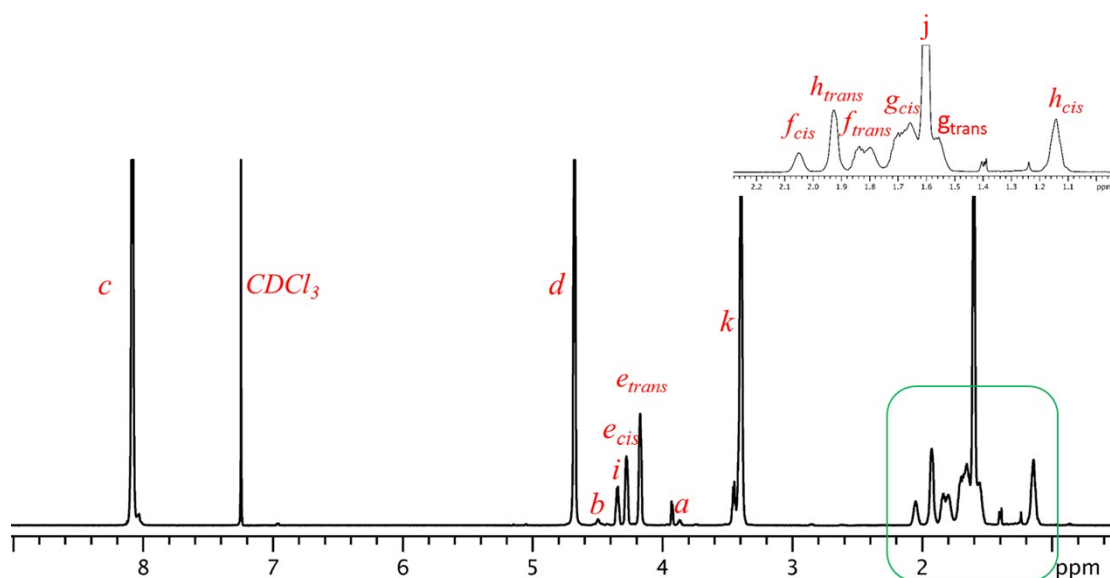

Figure S3.  $^1\text{H}$  quantitative NMR spectra of PEE 70/30 sample. Solvent:  $\text{CDCl}_3$ .

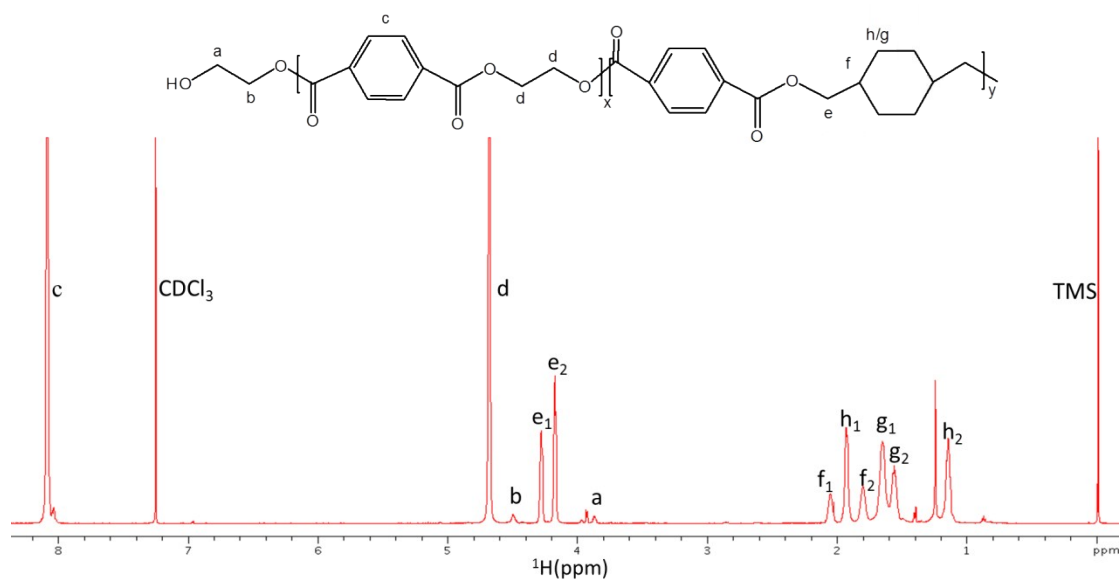

Figure S4.  $^1\text{H}$  quantitative NMR spectra of PETG sample. Solvent:  $\text{CDCl}_3$ .
